# Supplementary material for: Nutrient-Dependent Endocycling in Steroidogenic Tissue Dictates Timing of Metamorphosis in Drosophila melanogaster
Source: PubMed Central journal article supplement (PMC5298324; doi:10.1371/journal.pgen.1006583), 2017-01-25
Supplement: pgen.1006583.s007.pdf [file pgen.1006583.s007.pdf]

**S1 Table. Fly stocks used in this study**

| Stock name                                                                                        | Source*        | Stock# | Property                       |
|---------------------------------------------------------------------------------------------------|----------------|--------|--------------------------------|
| <i>Oregon R</i>                                                                                   | S. Kobayashi   | -      |                                |
| <i>w<sup>1118</sup></i>                                                                           | BDSC           | 5905   |                                |
| <i>P{CaryP}attP2</i>                                                                              | BDSC           | 36303  |                                |
| <i>UAS-dicer2</i>                                                                                 | VDRC           | v60008 |                                |
| <i>UAS-CycE-1 (CycE.R)</i>                                                                        | BDSC           | 30725  | Type1 CycE                     |
| <i>UAS-TOR.TED</i>                                                                                | BDSC           | 7013   | Dominant negative form of TOR  |
| <i>UAS-S6k.TE</i>                                                                                 | BDSC           | 6912   | Active form of S6k             |
| <i>UAS-RagA.T16N</i>                                                                              | T. P. Neufeld  | -      | Dominant negative form of RagA |
| <i>UAS-InR.K1409A</i>                                                                             | BDSC           | 8253   | Dominant negative form of InR  |
| <i>UAS-InR.A1325D</i>                                                                             | BDSC           | 8263   | Active form of InR             |
| <i>UAS-mCD8::GFP</i>                                                                              | BDSC           | 5130   |                                |
| <i>tub-Gal80<sup>ts</sup></i>                                                                     | BDSC           | 7017   |                                |
| <i>phantom<sup>22</sup>-Gal4</i>                                                                  | M. B. O'Connor | -      | PG-selective Gal4 line         |
| *BDSC, Bloomington <i>Drosophila</i> Stock Center; VDRC, Vienna <i>Drosophila</i> Resource Center |                |        |                                |
