# Supplementary material for: Nutrient-Dependent Endocycling in Steroidogenic Tissue Dictates Timing of Metamorphosis in Drosophila melanogaster
Source: PubMed Central journal article supplement (PMC5298324; doi:10.1371/journal.pgen.1006583), 2017-01-25
Supplement: pgen.1006583.s008.pdf [file pgen.1006583.s008.pdf]

**S2 Table. Fly stocks for RNAi experiment in this study**

| Stock name             | Target Gene   | Source* | Stock#  | Target site in gene region (bp) | Target length (bp) |
|------------------------|---------------|---------|---------|---------------------------------|--------------------|
| <i>UAS-E2F1 RNAi-1</i> | <i>E2F1</i>   | BDSC    | 27564   | 35137-35559                     | 423                |
| <i>UAS-E2F1 RNAi-2</i> | <i>E2F1</i>   | VDRC    | v15886  | 35176-35550                     | 375                |
| <i>UAS-CycE RNAi-1</i> | <i>CycE</i>   | BDSC    | 29314   | 18149-18555                     | 407                |
| <i>UAS-CycE RNAi-2</i> | <i>CycE</i>   | VDRC    | v110204 | 18149-18487                     | 339                |
| <i>UAS-Cdk2 RNAi-1</i> | <i>Cdk2</i>   | BDSC    | 36128   | 614-634                         | 21                 |
| <i>UAS-Cdk2 RNAi-2</i> | <i>Cdk2</i>   | VDRC    | v104959 | 1367-1669                       | 303                |
| <i>UAS-Cdt1 RNAi-1</i> | <i>Cdt1</i>   | BDSC    | 29562   | 2991-3458                       | 468                |
| <i>UAS-Cdt1 RNAi-2</i> | <i>Cdt1</i>   | VDRC    | v23131  | 3479-3788                       | 310                |
| <i>UAS-PCNA RNAi-1</i> | <i>PCNA</i>   | VDRC    | v51253  | 365-733                         | 369                |
| <i>UAS-PCNA RNAi-2</i> | <i>PCNA</i>   | VDRC    | v108384 | 467-854                         | 388                |
| <i>UAS-Cul4 RNAi-1</i> | <i>Cul4</i>   | BDSC    | 50614   | 766-786                         | 21                 |
| <i>UAS-Cul4 RNAi-2</i> | <i>Cul4</i>   | VDRC    | v105668 | 1268-1620                       | 353                |
| <i>UAS-Ddb1 RNAi-1</i> | <i>Ddb1</i>   | BDSC    | 41997   | 2632-2652                       | 21                 |
| <i>UAS-Ddb1 RNAi-2</i> | <i>Ddb1</i>   | VDRC    | v108924 | 2732-3397                       | 666                |
| <i>UAS-Fzr RNAi</i>    | <i>Fzr</i>    | VDRC    | v25553  | 11002-11326                     | 325                |
| <i>UAS-TOR RNAi-1</i>  | <i>TOR</i>    | BDSC    | 34639   | 7341-7361                       | 21                 |
| <i>UAS-TOR RNAi-2</i>  | <i>TOR</i>    | BDSC    | 33951   | 3633-3653                       | 21                 |
| <i>UAS-Rheb RNAi</i>   | <i>Rheb</i>   | BDSC    | 33966   | 1464-1484                       | 21                 |
| <i>UAS-raptor RNAi</i> | <i>raptor</i> | BDSC    | 34814   | 3566-3586                       | 21                 |
| <i>UAS-ric1 RNAi-1</i> | <i>ric1</i>   | BDSC    | 31388   | 3266-3675                       | 410                |
| <i>UAS-ric1 RNAi-2</i> | <i>ric1</i>   | BDSC    | 31527   | 4890-5351                       | 462                |

\*BDSC, Bloomington *Drosophila* Stock Center; VDRC, Vienna *Drosophila* Resource Center
