# Supplementary material for: Nutrient-Dependent Endocycling in Steroidogenic Tissue Dictates Timing of Metamorphosis in Drosophila melanogaster
Source: PubMed Central journal article supplement (PMC5298324; doi:10.1371/journal.pgen.1006583), 2017-01-25
Supplement: pgen.1006583.s009.pdf [file pgen.1006583.s009.pdf]

**S3 Table. Genotypes of the flies used in this study**

| Name and properties                                                                                          | Abbreviated fly genotypes                           | Genotypes of parents*                                                             |
|--------------------------------------------------------------------------------------------------------------|-----------------------------------------------------|-----------------------------------------------------------------------------------|
| Control (for RNAi experiment)                                                                                | <i>phm22 &gt; dicer2</i>                            | <i>w; UAS-dicer2; phantom<sup>22</sup>-Gal4</i>                                   |
|                                                                                                              |                                                     | <i>y v;; attP2</i>                                                                |
| RNAi against genes of interest                                                                               | <i>phm22 &gt; dicer2, RNAi</i>                      | <i>w; UAS-dicer2; phantom<sup>22</sup>-Gal4</i>                                   |
|                                                                                                              |                                                     | <i>UAS-RNAi**</i>                                                                 |
| <i>Fzr</i> RNAi +InR <sup>CA</sup>                                                                           | <i>phm22 &gt; dicer2, Fzr RNAi, InR.A1325D</i>      | <i>w; UAS-dicer2; phantom<sup>22</sup>-Gal4</i>                                   |
|                                                                                                              |                                                     | <i>w; UAS-Fzr RNAi UAS-InR.A1325D</i>                                             |
| Control                                                                                                      | <i>phm22 &gt; +</i>                                 | <i>w<sup>1118</sup>;; phantom<sup>22</sup>-Gal4</i>                               |
|                                                                                                              |                                                     | <i>w<sup>1118</sup></i>                                                           |
| TOR <sup>DN</sup>                                                                                            | <i>phm22 &gt; TOR.TED</i>                           | <i>w<sup>1118</sup>;; phantom<sup>22</sup>-Gal4</i>                               |
|                                                                                                              |                                                     | <i>w<sup>1118</sup>; UAS-TOR.TED</i>                                              |
| Control +GFP                                                                                                 | <i>phm22 &gt; mCD8::GFP</i>                         | <i>w<sup>1118</sup>;; phantom<sup>22</sup>-Gal4 UAS-mCD8::GFP</i>                 |
|                                                                                                              |                                                     | <i>w<sup>1118</sup></i>                                                           |
| TOR <sup>DN</sup> +GFP                                                                                       | <i>phm22 &gt; mCD8::GFP, TOR.TED</i>                | <i>w<sup>1118</sup>;; phantom<sup>22</sup>-Gal4 UAS-mCD8::GFP</i>                 |
|                                                                                                              |                                                     | <i>w<sup>1118</sup>; UAS-TOR.TED</i>                                              |
| TOR <sup>DN</sup> +CycE-1                                                                                    | <i>phm22 &gt; TOR.TED, CycE-1</i>                   | <i>w<sup>1118</sup>;; phantom<sup>22</sup>-Gal4</i>                               |
|                                                                                                              |                                                     | <i>w<sup>1118</sup>; UAS-TOR.TED UAS-CycE-1</i>                                   |
| TOR <sup>DN</sup> +S6k <sup>TE</sup>                                                                         | <i>phm22 &gt; TOR.TED, S6k.TE</i>                   | <i>w<sup>1118</sup>;; phantom<sup>22</sup>-Gal4</i>                               |
|                                                                                                              |                                                     | <i>w<sup>1118</sup>; UAS-TOR.TED UAS-S6k.TE</i>                                   |
| TOR <sup>DN</sup> +CycE-1 +GFP                                                                               | <i>phm22 &gt; mCD8::GFP, TOR.TED, CycE-1</i>        | <i>w<sup>1118</sup>;; phantom<sup>22</sup>-Gal4 UAS-mCD8::GFP</i>                 |
|                                                                                                              |                                                     | <i>w<sup>1118</sup>; UAS-TOR.TED UAS-CycE-1</i>                                   |
| TOR <sup>DN</sup> +S6k <sup>TE</sup> +GFP                                                                    | <i>phm22 &gt; mCD8::GFP, TOR.TED, S6k.TE</i>        | <i>w<sup>1118</sup>;; phantom<sup>22</sup>-Gal4 UAS-mCD8::GFP</i>                 |
|                                                                                                              |                                                     | <i>w<sup>1118</sup>; UAS-TOR.TED UAS-S6k.TE</i>                                   |
| Control (for temperature-shift experiment)                                                                   | <i>tub-Gal80<sup>ts</sup> phm22 &gt; +</i>          | <i>w<sup>1118</sup>;; phantom<sup>22</sup>-Gal4 tub-Gal80<sup>ts</sup></i>        |
|                                                                                                              |                                                     | <i>w<sup>1118</sup></i>                                                           |
| TOR <sup>DN</sup> +tub-Gal80 <sup>ts</sup>                                                                   | <i>tub-Gal80<sup>ts</sup> phm22 &gt; TOR.TED</i>    | <i>w<sup>1118</sup>;; phantom<sup>22</sup>-Gal4 tub-Gal80<sup>ts</sup></i>        |
|                                                                                                              |                                                     | <i>w<sup>1118</sup>; UAS-TOR.TED</i>                                              |
| RagA <sup>DN</sup>                                                                                           | <i>phm22 &gt; RagA.T16N</i>                         | <i>w<sup>1118</sup>;; phantom<sup>22</sup>-Gal4</i>                               |
|                                                                                                              |                                                     | <i>w<sup>1118</sup>; UAS-RagA.T16N</i>                                            |
| InR <sup>DN</sup>                                                                                            | <i>phm22 &gt; InR.K1409A</i>                        | <i>w<sup>1118</sup>;; phantom<sup>22</sup>-Gal4</i>                               |
|                                                                                                              |                                                     | <i>w<sup>1118</sup>;; UAS-InR.K1409A</i>                                          |
| InR <sup>CA</sup>                                                                                            | <i>phm22 &gt; InR.A1325D</i>                        | <i>w<sup>1118</sup>;; phantom<sup>22</sup>-Gal4</i>                               |
|                                                                                                              |                                                     | <i>w<sup>1118</sup>; UAS-InR.A1325D</i>                                           |
| InR <sup>CA</sup> +TOR <sup>DN</sup>                                                                         | <i>phm22 &gt; InR.A1325D, TOR.TED</i>               | <i>w<sup>1118</sup>;; phantom<sup>22</sup>-Gal4</i>                               |
|                                                                                                              |                                                     | <i>w<sup>1118</sup>; UAS-InR.A1325D UAS-TOR.TED</i>                               |
| InR <sup>CA</sup> +Gal80 <sup>ts</sup>                                                                       | <i>tub-Gal80<sup>ts</sup> phm22 &gt; InR.A1325D</i> | <i>w<sup>1118</sup>;; phantom<sup>22</sup>-Gal4 tub-Gal80<sup>ts</sup></i>        |
|                                                                                                              |                                                     | <i>w<sup>1118</sup>; UAS-InR.A1325D</i>                                           |
| Control (for epistasis analysis between <i>InR</i> and <i>Rheb/raptor</i> )                                  | <i>phm22 &gt; +</i>                                 | <i>w<sup>1118</sup>;; phantom<sup>22</sup>-Gal4</i>                               |
|                                                                                                              |                                                     | <i>y v;; attP2</i>                                                                |
| InR <sup>CA</sup> (for epistasis analysis between <i>InR</i> and <i>Rheb/raptor</i> )                        | <i>phm22 &gt; InR.A1325D</i>                        | <i>w<sup>1118</sup>; UAS-InR.A1325D; phantom<sup>22</sup>-Gal4/TM6B tub-Gal80</i> |
|                                                                                                              |                                                     | <i>y v;; attP2</i>                                                                |
| InR <sup>CA</sup> +RNAi (for epistasis analysis between <i>InR</i> and <i>Rheb/raptor</i> )                  | <i>phm22 &gt; InR.A1325D, RNAi</i>                  | <i>w<sup>1118</sup>; UAS-InR.A1325D; phantom<sup>22</sup>-Gal4/TM6B tub-Gal80</i> |
|                                                                                                              |                                                     | <i>UAS-RNAi**</i>                                                                 |
| * Flies with <i>w<sup>1118</sup></i> were backcrossed with <i>w<sup>1118</sup></i> (BDSC #5905) three times. |                                                     |                                                                                   |
| ** see S1 Table.                                                                                             |                                                     |                                                                                   |
