# Supplementary material for: Nutrient-Dependent Endocycling in Steroidogenic Tissue Dictates Timing of Metamorphosis in Drosophila melanogaster
Source: PubMed Central journal article supplement (PMC5298324; doi:10.1371/journal.pgen.1006583), 2017-01-25
Supplement: pgen.1006583.s010.pdf [file pgen.1006583.s010.pdf]

**S4 Table. The primer sets used for qPCR**

| gene name          | forward primer sequence (5'-3') | reverse primer sequence (5'-3') |
|--------------------|---------------------------------|---------------------------------|
| <i>rp49</i>        | ACAAATGGCGCAAGCCCAAGG           | ATGTGGCGGGTGCCTTGTT             |
| <i>neverland</i>   | GGAAGCGTTGCTGACGACTGTG          | TAAAGCCGTCCACTTCCTGCGA          |
| <i>spookier</i>    | TATCTCTGGGCACACTCGCTG           | GCCGAGCTAAATTTCTCCGCTT          |
| <i>shroud</i>      | CCACAACATCAAGTCGGAAGGAGC        | ACCAGGCGAATGGAATCGGG            |
| <i>phantom</i>     | GGATTTCTTTTCGGCGCGATGTG         | TGCCTCAGTATCGAAAAGCCGT          |
| <i>disembodied</i> | TGCCCTCAATCCCTATCTGGTC          | ACAGGGTCTTCACACCCATCTC          |
| <i>shadow</i>      | CCGCATTCAGCAGTCAGTGG            | ACCTGCCGTGTACAAGGAGAG           |
